# Supplementary material for: Effects of Transient Hypoxia versus Prolonged Hypoxia on Satellite Cell Proliferation and Differentiation In Vivo
Source: Hindawi journal article supplement (doi:10.1155/2015/961307), 2015-01-01
Supplement: f1 [file 961307.f1.pdf]

**Effects of transient versus prolonged hypoxia on satellite cell proliferation and differentiation in vivo**

**Sukanta Jash<sup>1</sup> and Samit Adhya<sup>\*</sup>**

**Supplementary Information**

**Table S1. Lentivirus shRNA inserts**

| Target                                   | shRNA Insert (sense strand) |                               |                                 |           |        | ORF position |
|------------------------------------------|-----------------------------|-------------------------------|---------------------------------|-----------|--------|--------------|
|                                          | Linker                      | sense                         | D loop                          | antisense | Linker |              |
| Hypoxia inducible factor subunit 1 alpha | 5'-                         | CCGGGCTCACCATCAGTTACTTACG     | CGAACGTAAGTAACTGATGGTGAGCTTTTTG | -3'       |        | 209          |
|                                          | 5'-                         | CCGGGCTACAAGAAACCGCCTATGA     | CGAATCATAGGCGGTTTCTTGAGCTTTTTG  | -3'       |        | 689          |
|                                          | 5'-                         | CCGGCACCGCAGACCCAGTTACAGAAACC | CGAAGGTTTCTGTAAGTGGTCTGCTTTTTG  | -3'       |        | 1823         |
| Delta like ligand 1 (Dll1)               | 5'-                         | CCGGGCGATGAATGCATCCGATACCA    | ACGGGTATCGGATGCATTTCATCGCTTTTTG | -3'       |        | 1047         |
|                                          | 5'-                         | CCGGGGGCTACACAGATCAAGAACA     | GAGATGTTCTTGATCTGTGTAGCCCTTTTTG | -3'       |        | 2088         |
|                                          | 5'-                         | CCGGGCTGACAAGAGCAGCTTTAAG     | CGAACTTAAAGCTGCTTGTGTCAGCTTTTTG | -3'       |        | 2144         |
| Notch 1                                  | 5'-                         | CCGGGCGTGTGCACAGAAGTTACA      | CGAATGTAACCTTCTGTGCACACGCTTTTTG | -3'       |        | 1895         |
|                                          | 5'-                         | CCGGGGACAAACTGTGACATCAACA     | AACGTGTTGATGTACAGTTTGTCTTTTTG   | -3'       |        | 2480         |
|                                          | 5'-                         | CCGGGCAGCCACAGAACTTACAAAT     | AACGATTGTAAGTTCTGTGGCTGCTTTTTG  | -3'       |        | 7362         |

**Table S2. Antibodies**

| Antigen       | Specificity   | Source | Vendor            | Dilution used |          |      |    |
|---------------|---------------|--------|-------------------|---------------|----------|------|----|
|               |               |        |                   | WB            | Confocal | ChIP | IP |
| COII          |               | rabbit | Abcam             | 2000          | 500      |      |    |
| COIV          |               | rabbit | Cell Signalling   |               | 200      |      |    |
| Pax7          |               | rabbit | Abcam             | 500           | 200      |      |    |
| HIF1 $\alpha$ |               | mouse  | Abcam             | 200           | 100      |      |    |
| HIF2 $\alpha$ |               | mouse  | Santacruz biotech | 200           |          |      |    |
| Dll1          |               | mouse  | Santacruz biotech | 200           | 100      |      |    |
| Notch1        | Notch 1, NICD | rabbit | Cell Signalling   | 200           | 100      |      |    |
| NICD          | NICD          | rabbit | Cell Signalling   | 200           | 100      | 25   |    |
| Hey2          |               | rabbit | BD bioscience     | 500           |          |      |    |
| Numb          |               | goat   | Abcam             | 200           | 100      |      |    |
| Myf5          |               | mouse  | BD bioscience     | 500           | 500      |      |    |
| MyoD          |               | mouse  | BD bioscience     | 1000          | 1000     | 50   |    |
| MyoG          |               | mouse  | BD bioscience     | 500           |          |      |    |
| Ccnd1         |               | rabbit | Cell Signalling   | 1000          |          |      |    |
| PCNA          |               | mouse  | Santacruz biotech | 1000          | 1000     |      |    |

**Table S3.** Primers for transcript analyses.

| <b>Code</b> | <b>Sequence</b>           | <b>Locus</b>   | <b>Position</b> | <b>Orientation</b> | <b>Remarks</b>                               |
|-------------|---------------------------|----------------|-----------------|--------------------|----------------------------------------------|
| O-357       | CGCACTTTCTTTCCAGAGTCA     | Ccnd1          | +813            | S                  | Coding seq, exon4-5 junction<br>For Q RT PCR |
| O-358       | AAGGGCTTCAATCTGTTCTG      | Ccnd1          | +887            | AS                 |                                              |
| O-344       | CGATATCGCTGCGCTCGTCGTCGAC | $\beta$ -actin |                 | S                  | Q RT- PCR control                            |
| O-345       | GGCCAGGATAGAGCCACCAATCCAC | $\beta$ -actin |                 | AS                 |                                              |
|             |                           |                |                 |                    |                                              |
